# Supplementary material
Source: Springer Nature journal article supplement (https://www.springerprofessional.de/resource/supplementary/13673_2013_36_MOESM7_ESM.pdf/11899356)
Supplement: MOESM7 [file 11899356]

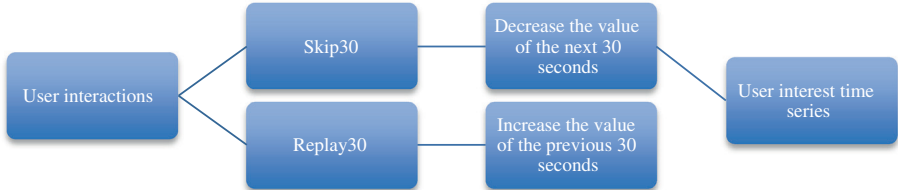

User interactions

Skip30

Decrease the value of the next 30 seconds

Replay30

Increase the value of the previous 30 seconds

User interest time series
